# Supplementary material for: A multi-stimuli responsive carbazole based low molecular weight gelator: nanomolar sensing of cyanide ions and electrochromic switching in real-time
Source: Royal Society of Chemistry journal article supplement (doi:10.1039/d4nj02029d), 2024-01-01
Supplement: d4nj02029d1.pdf [file d4nj02029d1.pdf]

## Supporting Information (SI)

### **Multi-stimuli Responsive Carbazole based Low Molecular Weight Gelator: Nanomolar Sensing of Cyanide Ions and Electrochromic Switching in Real-time**

Celin Rooth, Swatilekha Pratihari, Yuvaraj Palani, Anandhakumar Sukeri, Edamana Prasad

*Department of Chemistry, Indian Institute of Technology Madras (IITM), Chennai 600036, India*

#### Table of contents

|                                                                                                                   |     |
|-------------------------------------------------------------------------------------------------------------------|-----|
| <b>Figure SI-1:</b> $^1\text{H}$ NMR spectrum of CBG in DMSO- $\text{d}_6$ .....                                  | 2   |
| <b>Figure SI-2:</b> $^{13}\text{C}$ NMR spectrum of CBG in DMSO- $\text{d}_6$ .....                               | 2   |
| <b>Figure SI-3:</b> HRMS of CBG.....                                                                              | 3   |
| <b>Figure SI-4:</b> Lippert-Mataga plot.....                                                                      | 3   |
| <b>Figure SI-5:</b> DFT Calculated FMOs of CBG .....                                                              | 3,4 |
| <b>Figure SI-6:</b> DLS traces of CBG in THF/ $\text{H}_2\text{O}$ mixtures at different water fractions.....     | 4   |
| <b>Figure SI-7:</b> SEM images of aggregates at lower water fractions.....                                        | 5   |
| <b>Figure SI-8:</b> DLS traces at two different scattering angles and its SEM image.....                          | 6   |
| <b>Figure SI-9:</b> CBG gel in Dioxane- $\text{H}_2\text{O}$ mixture.....                                         | 6   |
| <b>Figure SI-10:</b> FT-IR spectra of CBG in its gel, solution and solid state.....                               | 7   |
| <b>Figure SI-11:</b> Absorption spectra changes upon addition of various anions .....                             | 8   |
| <b>Figure SI-12:</b> Stern-Volmer plot and determination of detection limit of CBG for $\text{CN}^-$ sensing..... | 8   |
| <b>Figure SI-13:</b> Sensing studies in solid and gel state.....                                                  | 9   |
| <b>Figure SI-14:</b> SEM image of CBG gel before and after addition of $\text{CN}^-$ .....                        | 9   |
| <b>Figure SI-15:</b> Sensing of $\text{CN}^-$ in real water sample.....                                           | 10  |
| <b>Figure SI-16:</b> Yellow colour of the solution that appeared at 1.7 V.....                                    | 12  |
| <b>Figure SI-17:</b> CV obtained when FTO plate is used as the working electrode.....                             | 12  |
| <b>Figure SI-18:</b> CBG gel sandwiched between FTO plates and CV in gel state.....                               | 12  |
| <b>Table SI-1:</b> Table containing the details of gelation test.....                                             | 7   |
| <b>Table SI-2:</b> Comparison table of literature reports of cyanide sensing.....                                 | 11  |
| <b>Scheme SI-1:</b> Deprotonation followed by the resonance stabilization.....                                    | 7   |

### <sup>1</sup>H NMR Spectrum

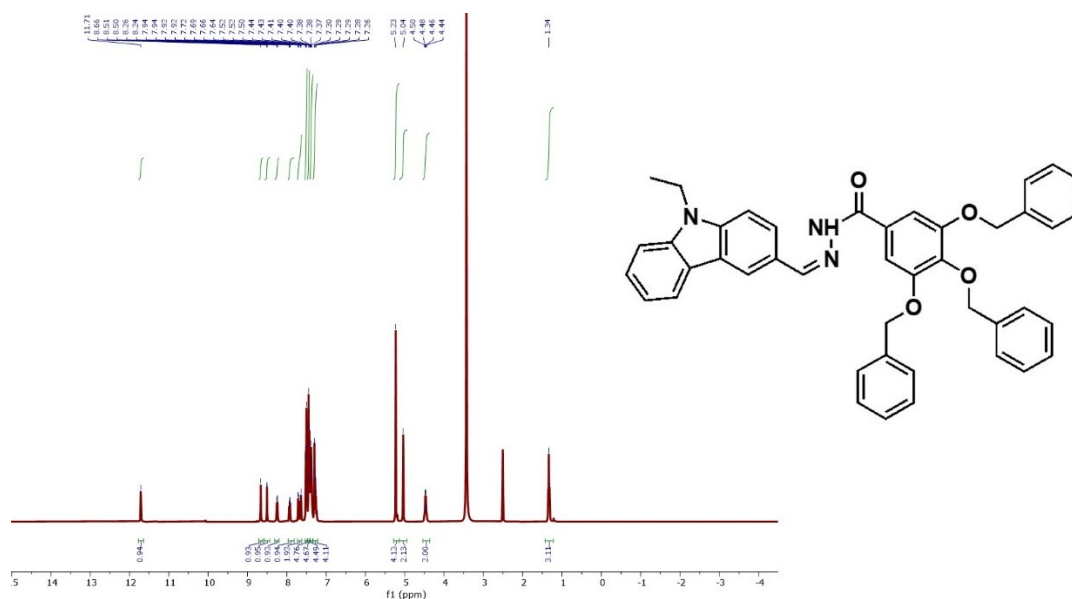Figure SI-1. <sup>1</sup>H NMR spectrum of CBG in DMSO-d<sub>6</sub>.

### <sup>13</sup>C NMR Spectrum

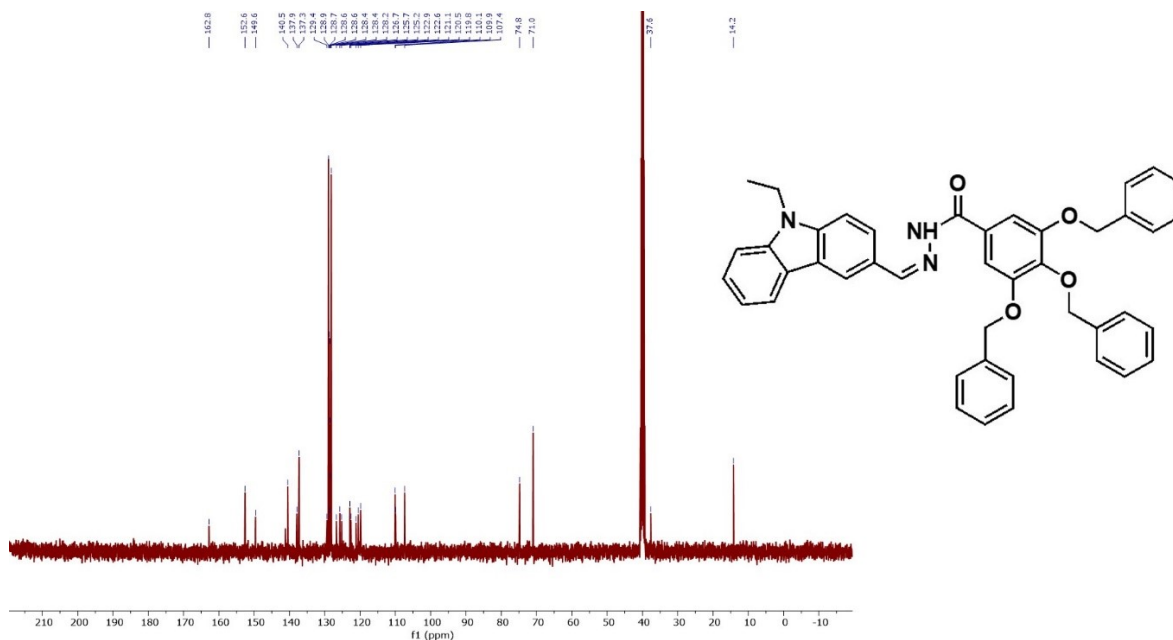

# HRMS

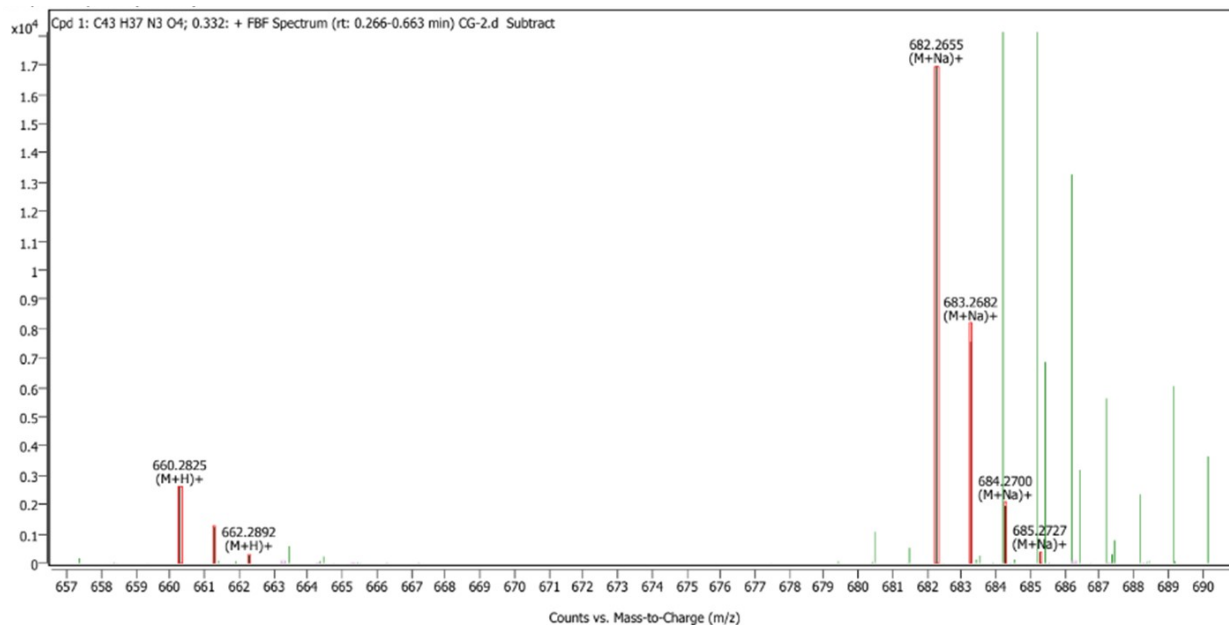

Compound ID Table

| Cpd | Formula       | Mass (Tgt) | Calc. Mass | Mass                 | Species           | Diff(Tgt.ppm) | mDa   |
|-----|---------------|------------|------------|----------------------|-------------------|---------------|-------|
| 1   | C43 H37 N3 O4 | 659.2784   | 659.2759   | 660.2825<br>682.2655 | (M+H)+<br>(M+Na)+ | -3.86         | -2.54 |

Figure SI-3. HRMS of CBG.

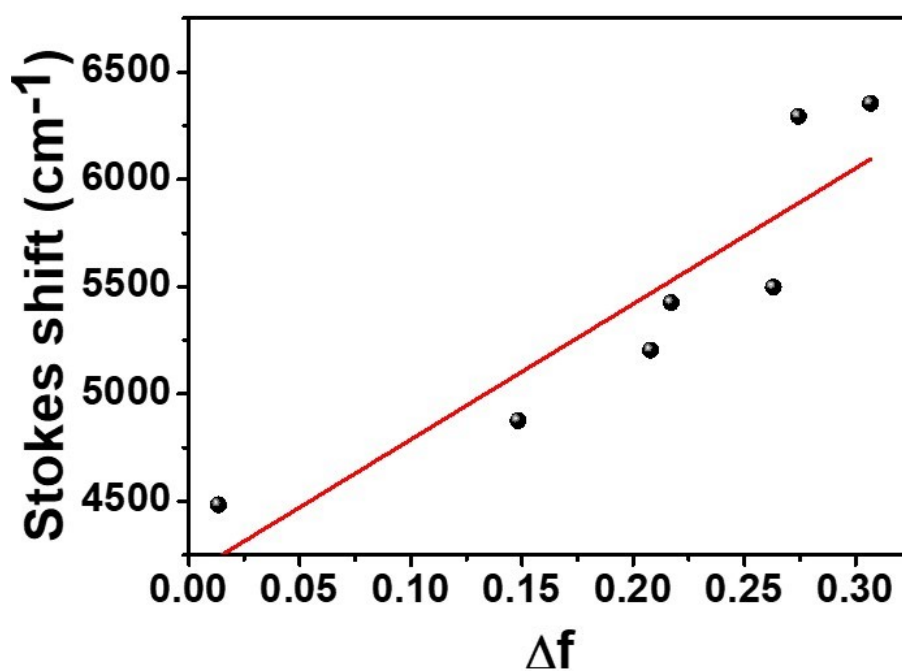

Figure SI-4. Lippert-Mataga plot of CBG.

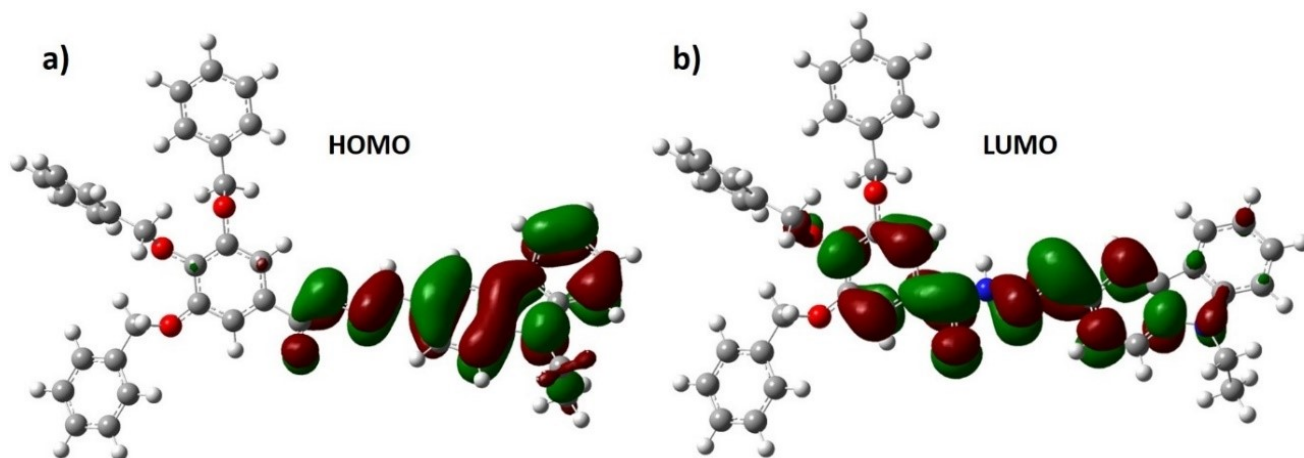

Figure SI-5. a) HOMO and b) LUMO orbitals in the optimized ground-state structure of CBG.

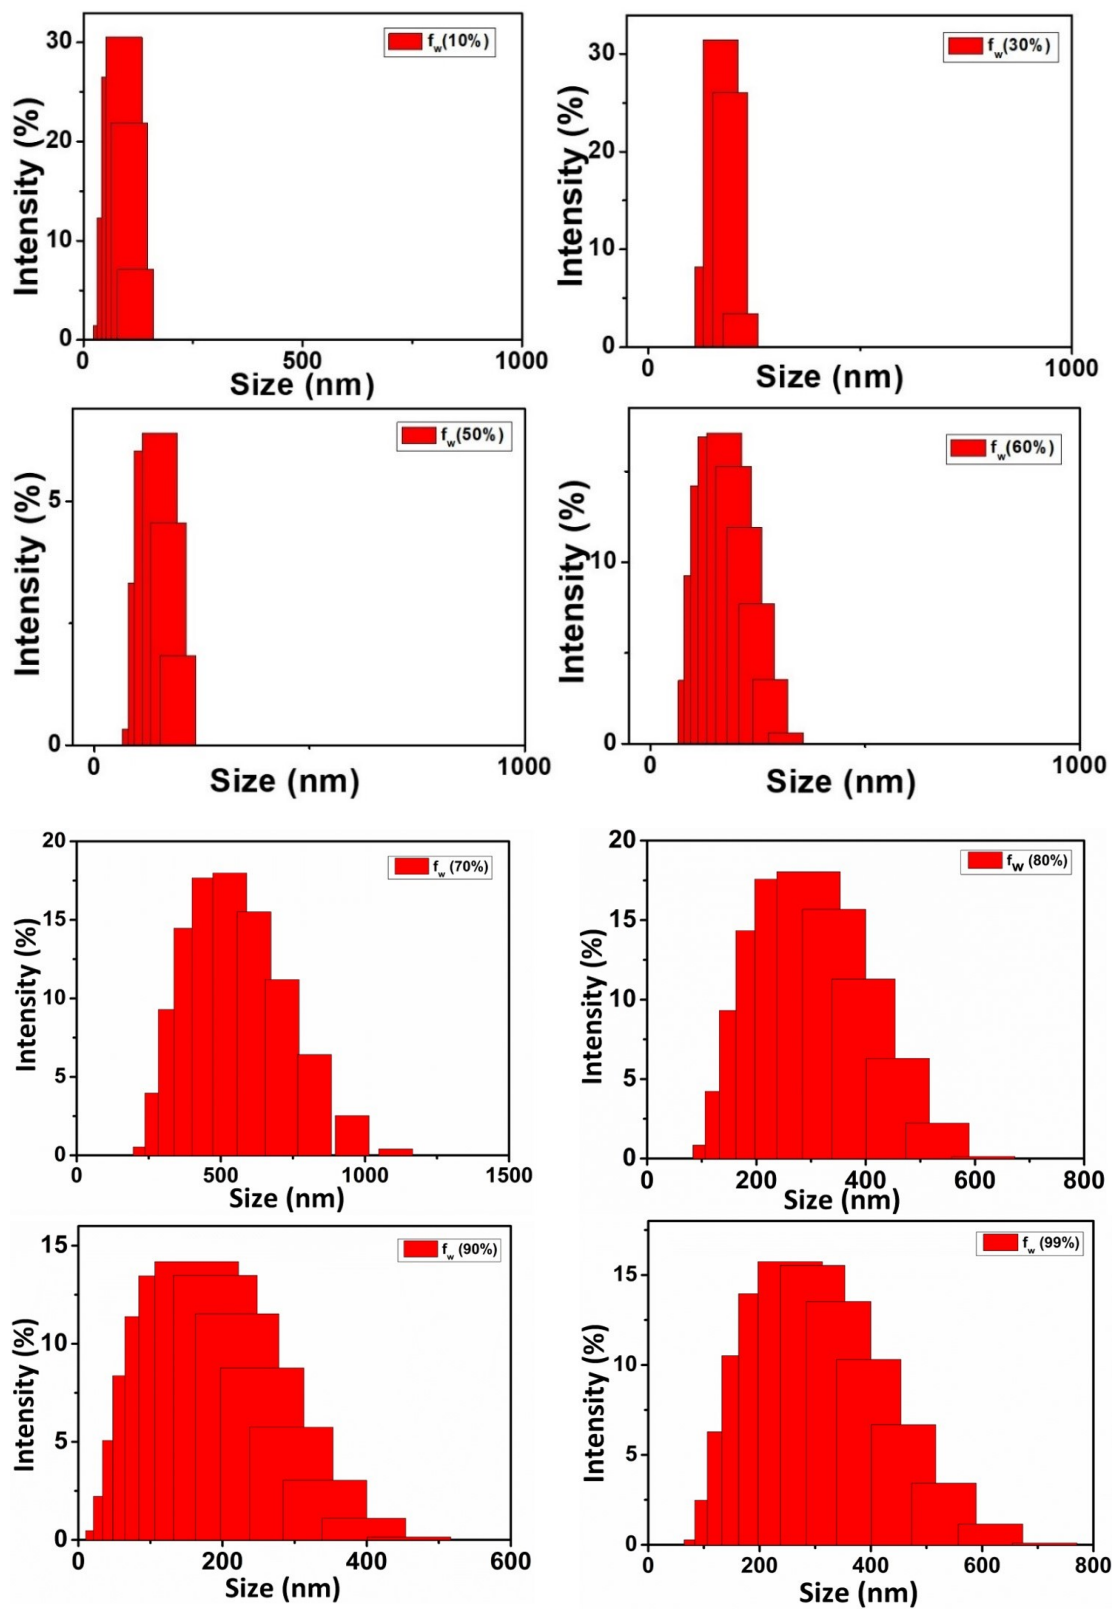

Figure SI-6. DLS traces of CBG in THF/H<sub>2</sub>O mixtures at  $f_w = 10\%$ ,  $30\%$ ,  $50\%$ ,  $60\%$ ,  $70\%$ ,  $80\%$ ,  $90\%$ ,  $99\%$ .

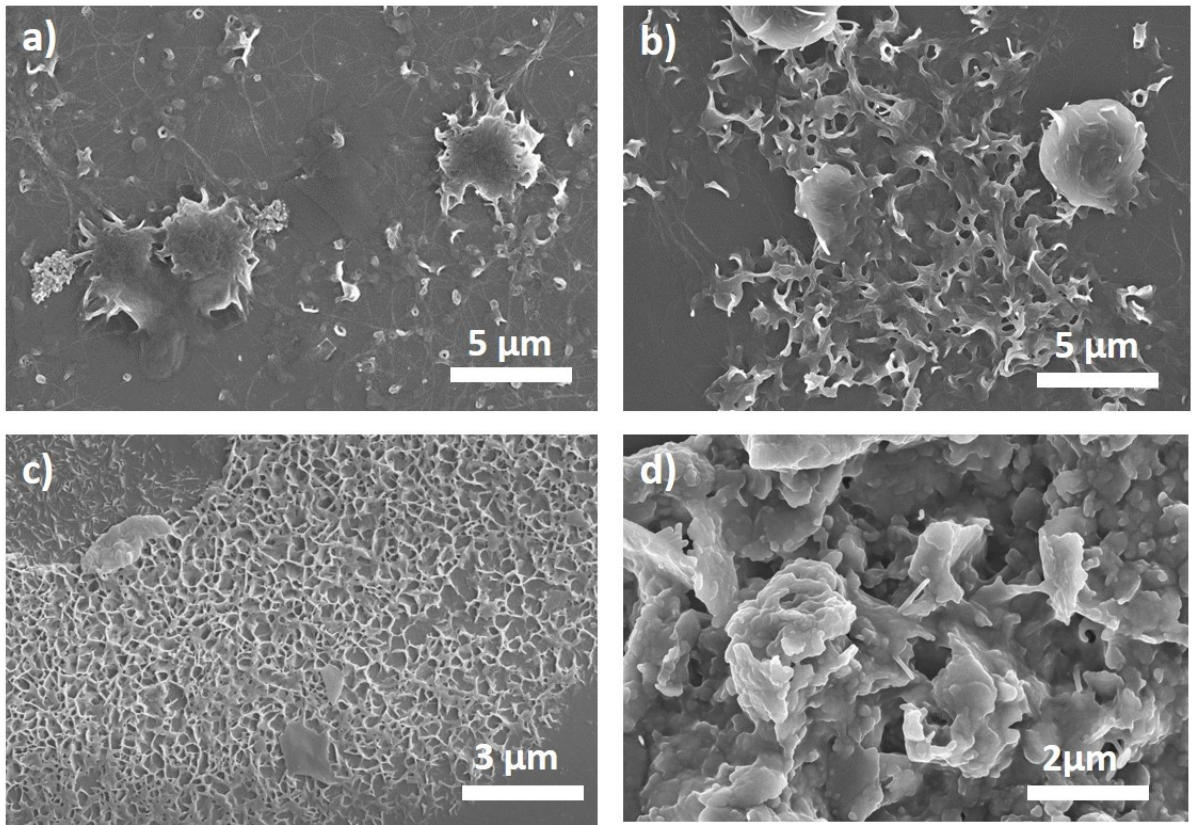

Figure SI-7. SEM images of a) 10%, b) 30%, c) 50%, d) 60% water fractions

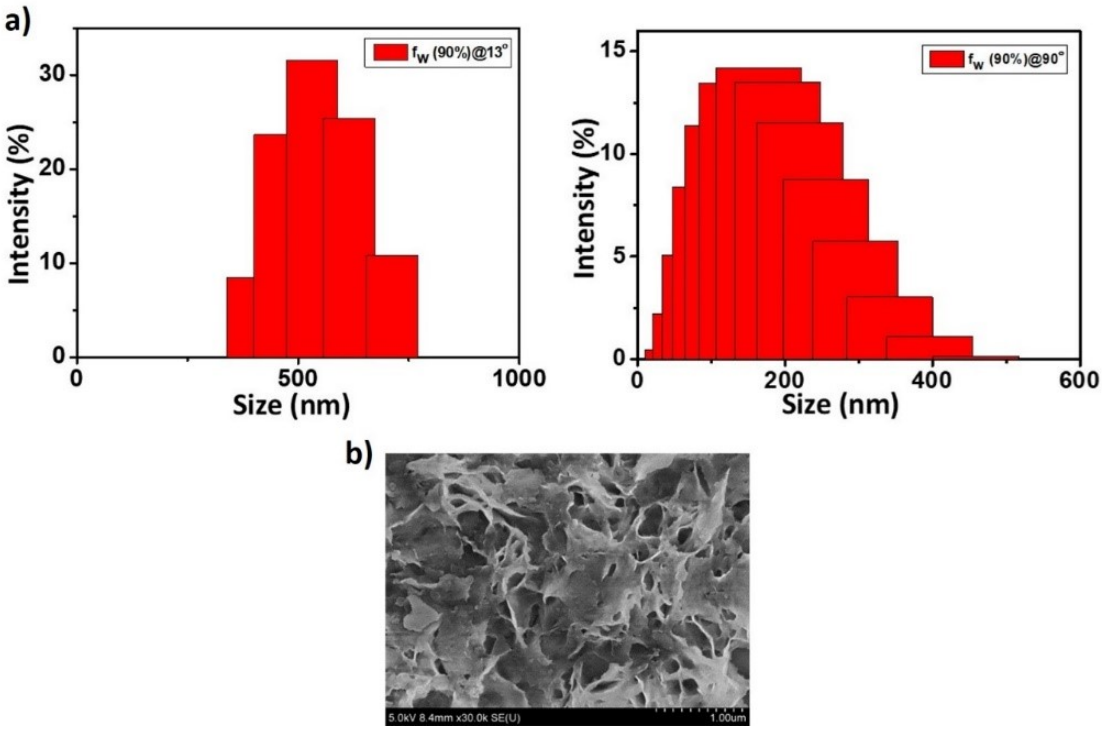

Figure SI-8. a) DLS traces of CBG ( $f_w=90%$ ) in THF/H<sub>2</sub>O mixtures at two different scattering angles (13°, 90°) and b) SEM image of  $f_w=90%$  (90:10).

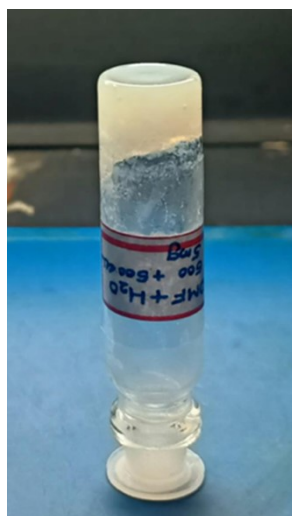

**Figure SI-9.** CBG gel in Dioxane-H<sub>2</sub>O mixture.

| Entry | Solvent                        | Phase (CGC) |
|-------|--------------------------------|-------------|
| 1     | CHCl <sub>3</sub>              | S           |
| 2     | DCM                            | S           |
| 3     | THF                            | S           |
| 4     | DMSO                           | S           |
| 5     | DMF                            | S           |
| 6     | Dioxane                        | S           |
| 7     | ACN                            | I           |
| 8     | Hexane                         | I           |
| 9     | DMF-H <sub>2</sub> O (1:1)     | G (5 mg)    |
| 10    | Dioxane-H <sub>2</sub> O (1:1) | G (5 mg)    |

**Table SI-1.** Table containing the details of gelation test.

(S: soluble, I: Insoluble G: gel formed)

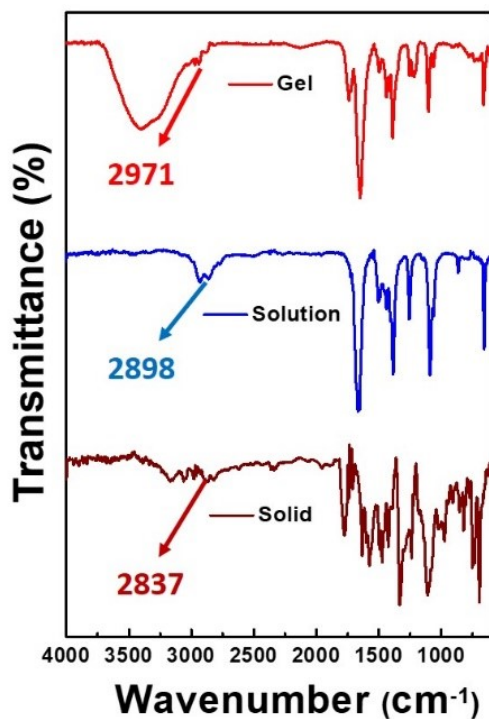

Figure SI-10. FT-IR spectra of CBG in its gel, solution and solid state

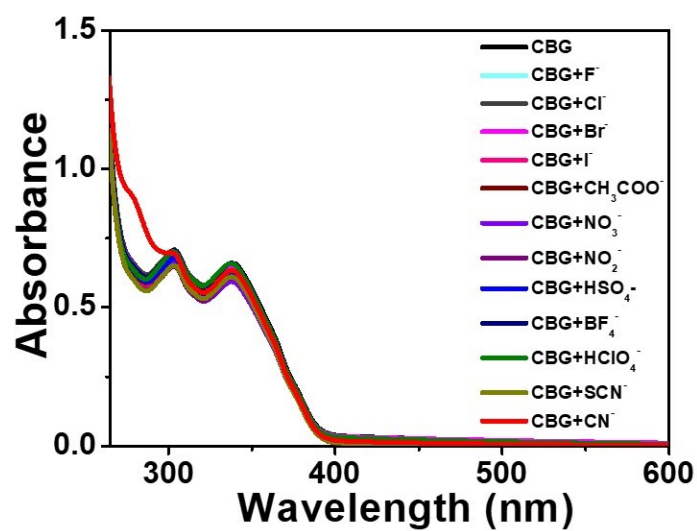

Figure SI-11. Absorption spectra changes upon addition of various anions as their tetra butyl ammonium salts.



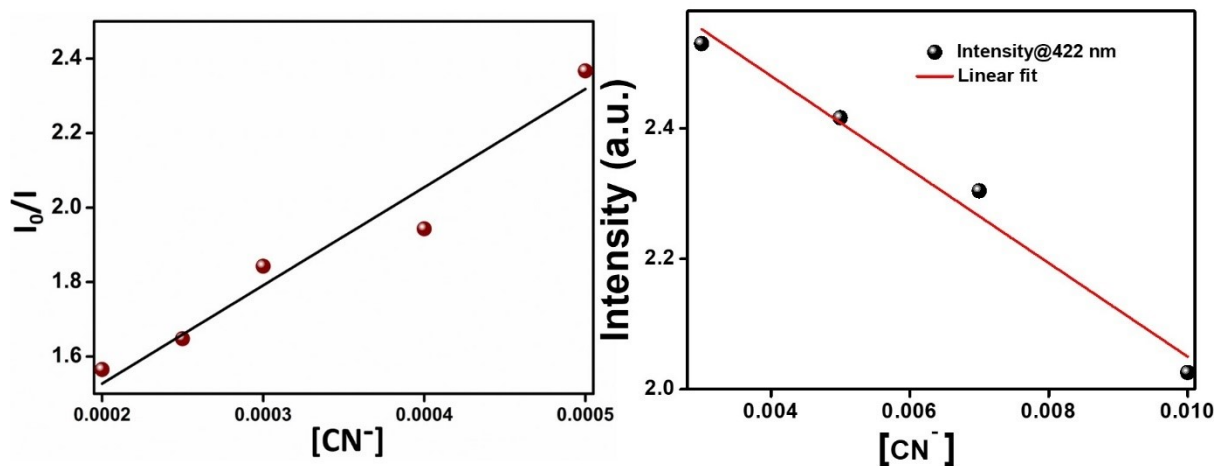

**Figure SI-12.** a) Stern-Volmer plot of CBG for  $CN^-$  sensing and b) determination of detection limit of CBG for  $CN^-$  sensing.

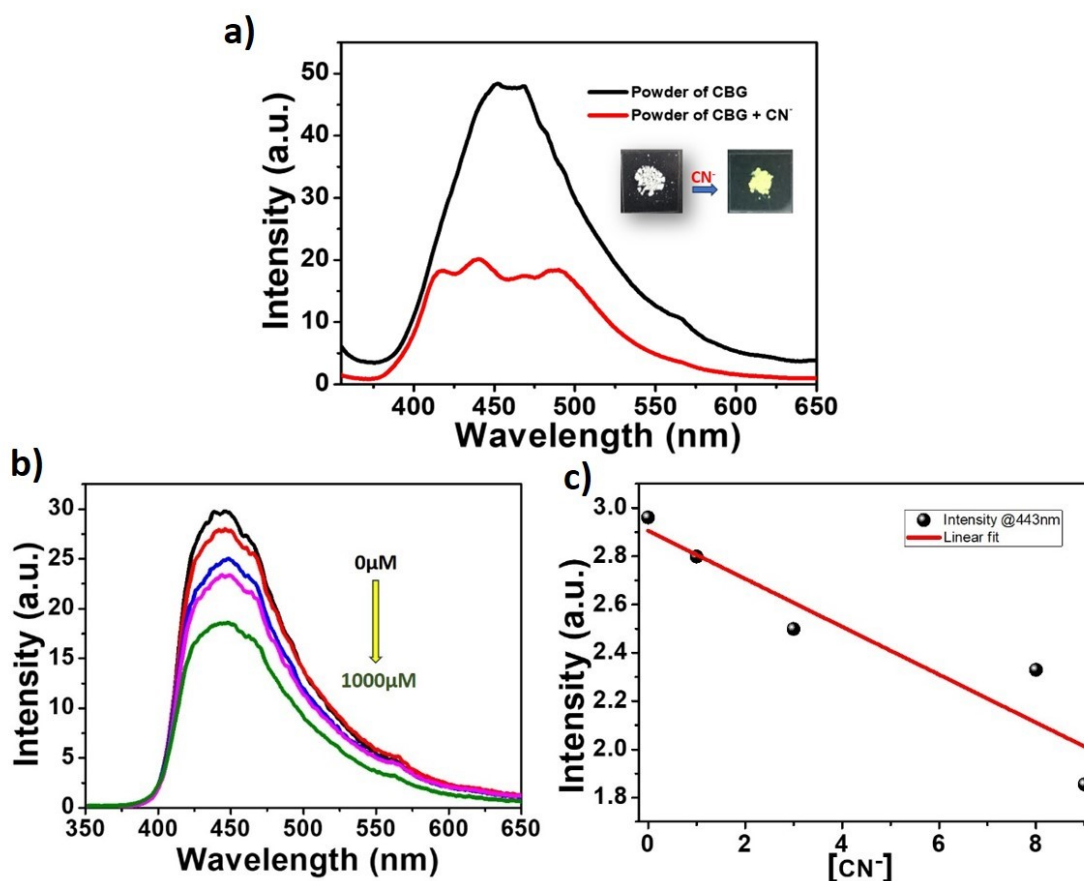

**Figure SI-13.** a) Emission spectra of CBG in its powder state and after treatment with  $CN^-$  b) Decrease in the emission intensity of CBG gel with increase in concentration of aq.  $CN^-$  and c) determination of detection limit of CBG gel for  $CN^-$  sensing.

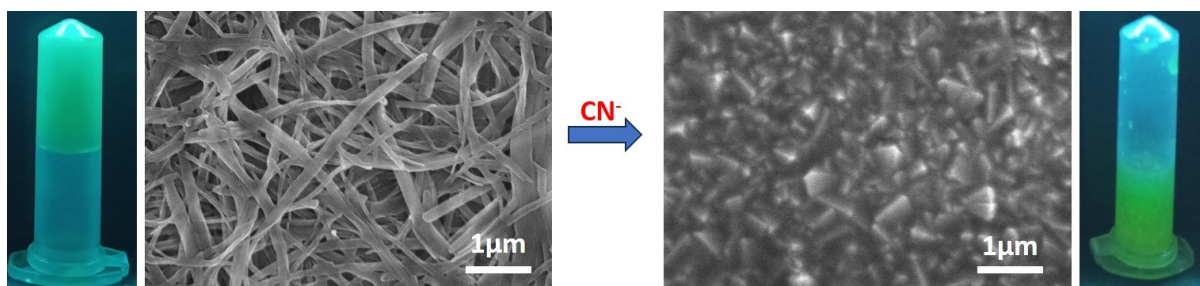

Figure SI-14. SEM image of CBG gel before and after addition on  $\text{CN}^-$

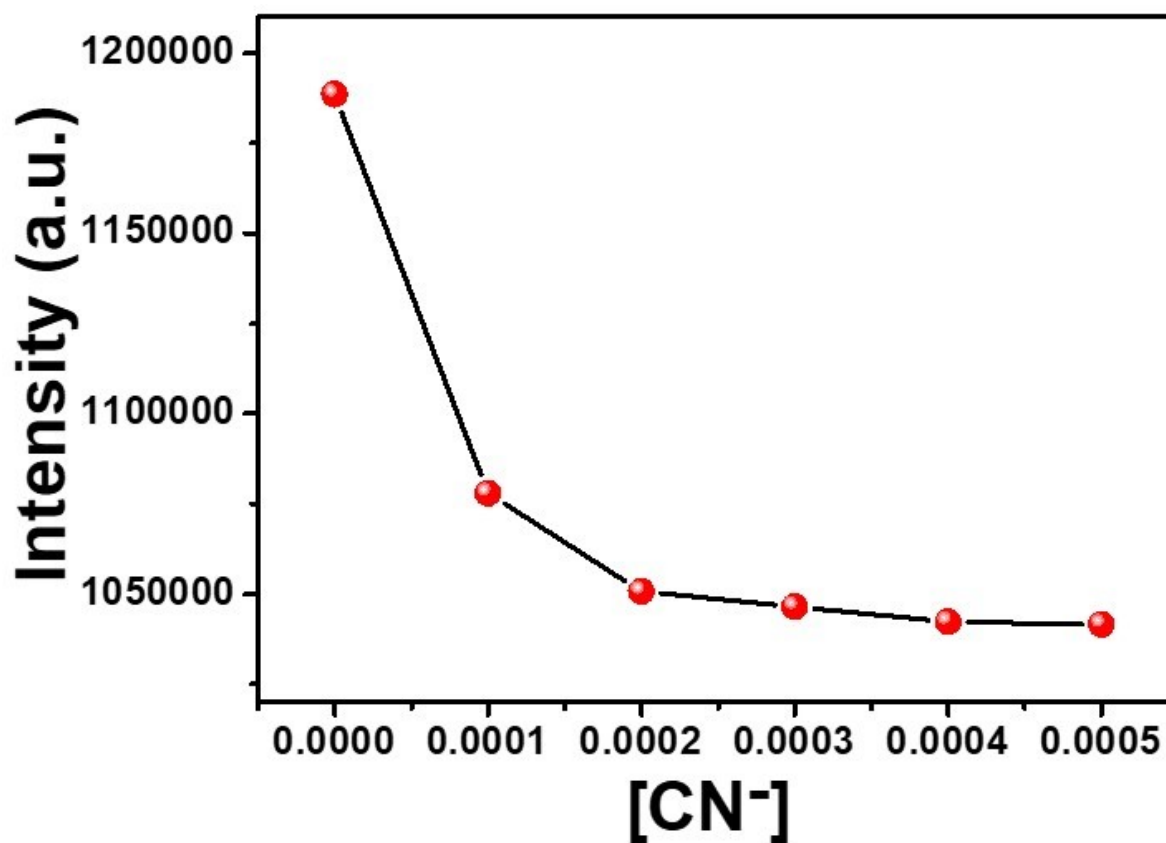

Figure SI-15. Decrease in fluorescence intensity with increase in concentration of  $\text{CN}^-$  in tap water.

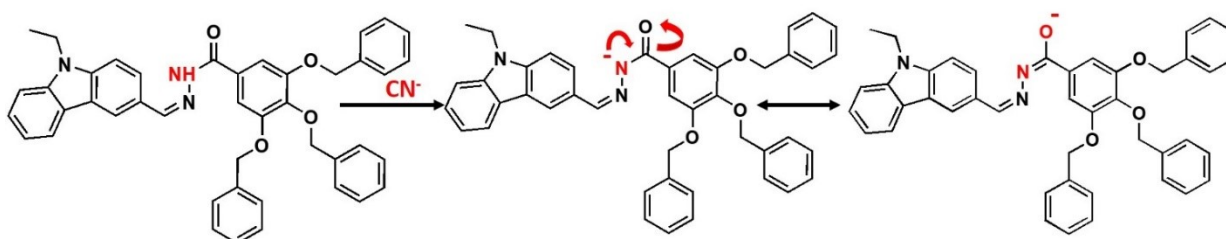

Scheme SI-1. Deprotonation upon cyanide addition followed by the resonance stabilization.

| Reference     | Detection limit | Medium   |       |     |
|---------------|-----------------|----------|-------|-----|
|               |                 | Solution | Solid | Gel |
| 1             | 0.28 $\mu$ M    | Yes      | -     | -   |
| 2             | 20nM            | Yes      | -     | -   |
| 3             | 67.4 nM         | Yes      | -     | -   |
| 4             | 0.0153 $\mu$ M  | Yes      | -     | -   |
| 5             | 51 nM           | Yes      | -     | -   |
| 6             | 11nM            | Yes      | -     | -   |
| 7             | 0.427 $\mu$ M   | -        | Yes   | -   |
| 8             | 39.3 nM         | Yes      | Yes   | -   |
| 9             | 0.5 $\mu$ M     | Yes      | Yes   | -   |
| 10            | 3.02 $\mu$ M    | Yes      | -     | Yes |
| Present study | 1.28nM          | Yes      | Yes   | Yes |

**Table SI-2.** Comparison table of literature reports of cyanide sensing

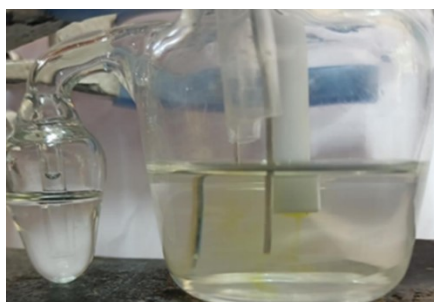

Figure SI-16. Yellow colour of the solution that appeared at 1.7 V.

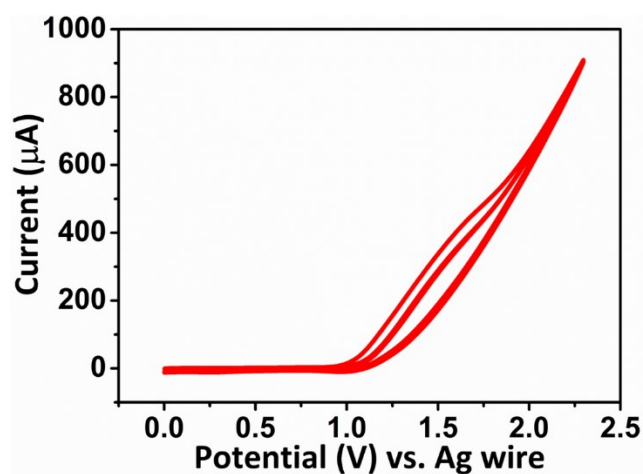

Figure SI-17. CV obtained when FTO plate is used as the working electrode.

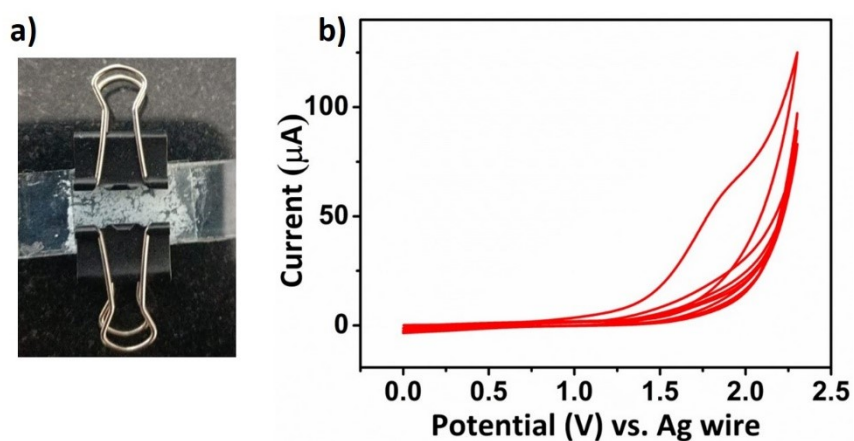

Figure SI-18. a) CBG gel sandwiched between FTO plates and b) CV in gel state.

## References

- 1 K. Y. Ryu, J. J. Lee, J. A. Kim, D. Y. Park and C. Kim, *RSC Adv*, 2016, **6**, 16586–16597.
- 2 H. W. Zhao, G. Wu, X. Y. Sun, J. Bin Chao, Y. Q. Li, L. Jiang and H. Han, *J Lumin*, 2018, **201**, 474–478.
- 3 Q. Zou, F. Tao, H. Wu, W. W. Yu, T. Li and Y. Cui, *Dyes Pigm*, 2019, **164**, 165–173.
- 4 J. H. Park, R. Manivannan, P. Jayasudha and Y. A. Son, *J Photochem Photobiol A Chem*, 2020, **397**.
- 5 Z. H. Zheng, Z. K. Li, L. J. Song, Q. W. Wang, Q. F. Huang and L. Yang, *Sensors*, 2017, **17**, 405.
- 6 S. Pramanik, V. Bhalla and M. Kumar, *ACS Appl Mater Interfaces*, 2014, **6**, 5930–5939.
- 7 Z. M. Dong, H. Ren, J. N. Wang and Y. Wang, *Microchemical Journal*, 2020, **397**
- 8 S. Manickam and S. K. Iyer, *RSC Adv*, 2020, **10**, 11791–11799.
- 9 C. Nandhini, P. S. Kumar, K. Poongodi, R. Shanmugapriya and K. P. Elango, *J Mol Liq*, 2021, **327**.
- 10 H. Yao, J. Wang, S. S. Song, Y. Q. Fan, X. W. Guan, Q. Zhou, T. B. Wei, Q. Lin and Y. M. Zhang, *New J Chem*, 2018, **42**, 18059–18065.
